# Supplementary material for: Separating phases of allopolyploid evolution with resynthesized and natural Capsella bursa-pastoris
Source: eLife. 2024 Jan 8;12:RP88398. doi: 10.7554/eLife.88398 (PMC10945474; doi:10.7554/eLife.88398)
Supplement: Figure 8—source data 1. [file elife-88398-fig8-data1.docx]

**Figure 8–Source Data 1** Expression level fold-change (log2FC) of homoeologs relative to the corresponding gene in diploid groups among genes with expression level dominance (ELD) in flowers or leaves.

| **Tissue** | **Source of ELD** | **log2FC of**  **EL-dominant homoeologs (meanse)** | **log2FC of**  **EL-recessive homoeologs (meanse)** | **p-value*** |
| --- | --- | --- | --- | --- |
| Flower | Sd/Sh ELD | 0.6390.013 | 1.8230.034 | <2.2e-16 |
| Cbp-specific ELD | 1.2080.037 | 2.6210.058 | <2.2e-16 |
| Leaf | Sd/Sh ELD | 0.7920.024 | 1.9330.048 | <2.2e-16 |
| Cbp-specific ELD | 1.4390.045 | 3.0670.072 | <2.2e-16 |

*The difference of expression fold change between EL-dominant and EL-recessive homoeologs was tested by Welch’s two sample t-tests.
